# Supplementary material for: Detection by Sensitive Real-Time Reverse Transcription Loop-Mediated Isothermal Amplification of Olive Leaf Yellowing Associated Virus and Its Incidence in Italy and Spain
Source: MDPI journal article supplement (doi:10.3390/horticulturae9060702), 2023-06-15
Supplement: s1 [file s1]

**Table S1.** Reaction mixtures, volumes, and protocols used for reverse transcription (RT), PCR, and RT-LAMP assays.

| RT Reaction Mixture                                                                                                                                   | Volume [μL] | RT Protocol                                                                                                                                                                            |
|-------------------------------------------------------------------------------------------------------------------------------------------------------|-------------|----------------------------------------------------------------------------------------------------------------------------------------------------------------------------------------|
| Total RNA                                                                                                                                             | 1           | 65 °C for 10 min<br>42 °C for 45 min<br>95 °C for 10 min                                                                                                                               |
| dNTPs [0.4 mM]                                                                                                                                        | 1           |                                                                                                                                                                                        |
| 5X First Strand Buffer                                                                                                                                | 4           |                                                                                                                                                                                        |
| Reverse primer [μM]                                                                                                                                   | 1           |                                                                                                                                                                                        |
| M-MLV reverse transcriptase [20 Units]                                                                                                                | 0.3         |                                                                                                                                                                                        |
| RNase-free water                                                                                                                                      | 12.7        |                                                                                                                                                                                        |
| Final reaction volume                                                                                                                                 | 20          |                                                                                                                                                                                        |
|                                                                                                                                                       |             |                                                                                                                                                                                        |
| PCR Reaction Mixture                                                                                                                                  | Volume [μL] | PCR Protocol                                                                                                                                                                           |
| cDNA                                                                                                                                                  | 2           | 95 °C for 3 min<br>40 cycles: 95 °C for 30 sec, 30 sec<br>at the specific annealing<br>temperature of each primer pair,<br>72 °C for 45 sec<br>72 °C for 10 min                        |
| 20 mM Tris–HCl [20 mM], KCl [50 mM], MgCl <sub>2</sub> [3 mM]                                                                                         | 5           |                                                                                                                                                                                        |
| dNTPs [0.4 mM]                                                                                                                                        | 1           |                                                                                                                                                                                        |
| Forward primer [1 μM]                                                                                                                                 | 1           |                                                                                                                                                                                        |
| Reverse primer [1 μM]                                                                                                                                 | 1           |                                                                                                                                                                                        |
| <i>Taq</i> DNA polymerase [2 Units]                                                                                                                   | 0.4         |                                                                                                                                                                                        |
| RNase-free water                                                                                                                                      | 14.6        |                                                                                                                                                                                        |
| Final reaction volume                                                                                                                                 | 25          |                                                                                                                                                                                        |
|                                                                                                                                                       |             |                                                                                                                                                                                        |
| RT-LAMP Reaction Mixture                                                                                                                              | Volume [μL] | LAMP and Melting Protocol                                                                                                                                                              |
| RNA                                                                                                                                                   | 1           |                                                                                                                                                                                        |
| LAMP Primer mix<br>OLYaV-F3 [0.2 μM]<br>OLYaV-B3 [0.2 μM]<br>OLYaV-FIP [1.6 μM]<br>OLYaV-BIP [1.6 μM]<br>OLYaV-LoopF [0.4 μM]<br>OLYaV-LoopB [0.4 μM] | 2.5         | 65 °C for 60 min (fluorescence<br>acquisition every 60 sec)<br><br>95 °C for 1 min<br>40 °C for 1 min<br>70 °C for 1 min and an increase of<br>temperature at 0.5 °C/s up to<br>95 °C. |
| LAMP Isothermal Master Mix                                                                                                                            | 15          |                                                                                                                                                                                        |
| RNase-free water                                                                                                                                      | 6.5         |                                                                                                                                                                                        |
| Final reaction volume                                                                                                                                 | 25          |                                                                                                                                                                                        |

**Table S2.** Real-time RT-LAMP assay results for OLYaV detection of symptomatic and asymptomatic field samples collected from different Spanish provinces. Asymptomatic samples resulted positive are underlined in gray.

| Sampling Area                                      | ID Sample | Symptomatic | Real-Time RT-LAMP | Sampling Area                       | ID Sample | Symptomatic | Real-Time RT-LAMP |
|----------------------------------------------------|-----------|-------------|-------------------|-------------------------------------|-----------|-------------|-------------------|
| Valencia province<br>(Comunitat Valenciana, Spain) | VAL/01    | +           | +                 | Jaén province<br>(Andalusia, Spain) | JAÉ/01    | +           | +                 |
|                                                    | VAL/02    | +           | +                 |                                     | JAÉ/02    | -           | -                 |
|                                                    | VAL/03    | -           | +                 |                                     | JAÉ/03    | +           | +                 |
|                                                    | VAL/04    | -           | +                 |                                     | JAÉ/04    | -           | -                 |
|                                                    | VAL/05    | -           | -                 |                                     | JAÉ/05    | +           | +                 |
|                                                    | VAL/06    | -           | -                 |                                     | JAÉ/06    | +           | +                 |
|                                                    | VAL/07    | -           | -                 |                                     | JAÉ/07    | +           | +                 |
|                                                    | VAL/08    | -           | -                 |                                     | JAÉ/08    | +           | +                 |
|                                                    | VAL/09    | +           | +                 |                                     | JAÉ/09    | -           | -                 |

|                                                        |        |   |   |                                        |        |   |   |
|--------------------------------------------------------|--------|---|---|----------------------------------------|--------|---|---|
|                                                        | VAL/10 | - | - |                                        | JAÉ/10 | - | - |
|                                                        | VAL/11 | + | + |                                        | JAÉ/11 | - | - |
|                                                        | VAL/12 | - | - |                                        | JAÉ/12 | - | - |
|                                                        | VAL/13 | + | + |                                        | JAÉ/13 | - | + |
|                                                        | VAL/14 | + | + |                                        | JAÉ/14 | - | - |
|                                                        | VAL/15 | - | - |                                        | JAÉ/15 | + | + |
|                                                        | VAL/16 | + | + |                                        | JAÉ/16 | - | - |
|                                                        | VAL/17 | + | + |                                        | JAÉ/17 | + | + |
|                                                        | VAL/18 | + | + |                                        | JAÉ/18 | + | + |
|                                                        | VAL/19 | + | + |                                        | JAÉ/19 | + | + |
|                                                        | VAL/20 | + | + |                                        | JAÉ/20 | - | - |
| Castellón province<br>(Comunitat<br>Valenciana, Spain) | CAS/01 | - | - | Granada province<br>(Andalusia, Spain) | GRA/01 | - | - |
|                                                        | CAS/02 | - | - |                                        | GRA/02 | - | - |
|                                                        | CAS/03 | + | + |                                        | GRA/03 | - | - |
|                                                        | CAS/04 | - | - |                                        | GRA/04 | - | + |
|                                                        | CAS/05 | + | + |                                        | GRA/05 | - | - |
|                                                        | CAS/06 | - | - |                                        | GRA/06 | - | - |
|                                                        | CAS/07 | - | - |                                        | GRA/07 | - | - |
|                                                        | CAS/08 | - | - |                                        | GRA/08 | - | - |
|                                                        | CAS/09 | + | + |                                        | GRA/09 | - | - |
|                                                        | CAS/10 | + | + |                                        | GRA/10 | + | + |
|                                                        | CAS/11 | - | - |                                        | GRA/11 | - | - |
|                                                        | CAS/12 | - | - |                                        | GRA/12 | - | - |
|                                                        | CAS/13 | - | - |                                        | GRA/13 | + | + |
|                                                        | CAS/14 | - | - |                                        | GRA/14 | - | - |
|                                                        | CAS/15 | + | + |                                        | GRA/15 | - | - |
|                                                        | CAS/16 | + | + |                                        | GRA/16 | - | - |
|                                                        | CAS/17 | - | - |                                        | GRA/17 | - | - |
|                                                        | CAS/18 | + | + |                                        | GRA/18 | - | - |
|                                                        | CAS/19 | - | - |                                        | GRA/19 | - | + |
|                                                        | CAS/20 | + | + |                                        | GRA/20 | + | + |
| OLYaV positive<br>control                              | PC     | / | + |                                        |        |   |   |

**Table S3.** Real-time RT-LAMP assay results for OLYaV detection of symptomatic and asymptomatic field samples collected from different Italian provinces. Asymptomatic samples resulted positive are underlined in gray.

| Sampling Area                         | ID Sample | Symptomatic | Real-Time RT-LAMP | Sampling Area                         | ID Sample | Symptomatic | Real-Time RT-LAMP | Sampling Area                        | ID Sample | Symptomatic | Real-Time RT-LAMP |
|---------------------------------------|-----------|-------------|-------------------|---------------------------------------|-----------|-------------|-------------------|--------------------------------------|-----------|-------------|-------------------|
| Agrigento province<br>(Sicily, Italy) | AGR/01    | -           | -                 | Crotone province<br>(Calabria, Italy) | CRO/01    | -           | -                 | Frosinone province<br>(Lazio, Italy) | FRO/01    | -           | -                 |
|                                       | AGR/02    | -           | -                 |                                       | CRO/02    | +           | +                 |                                      | FRO/02    | -           | -                 |
|                                       | AGR/03    | +           | +                 |                                       | CRO/03    | -           | -                 |                                      | FRO/03    | -           | -                 |
|                                       | AGR/04    | -           | +                 |                                       | CRO/04    | -           | -                 |                                      | FRO/04    | -           | -                 |
|                                       | AGR/05    | -           | -                 |                                       | CRO/05    | -           | -                 |                                      | FRO/05    | -           | -                 |
|                                       | AGR/06    | +           | +                 |                                       | CRO/06    | -           | -                 |                                      | FRO/06    | -           | -                 |
|                                       | AGR/07    | -           | -                 |                                       | CRO/07    | -           | -                 |                                      | FRO/07    | -           | -                 |
|                                       | AGR/08    | -           | -                 |                                       | CRO/08    | -           | -                 |                                      | FRO/08    | -           | -                 |
|                                       | AGR/09    | +           | +                 |                                       | CRO/09    | -           | -                 |                                      | FRO/09    | -           | -                 |
|                                       | AGR/10    | -           | -                 |                                       | CRO/10    | -           | -                 |                                      | FRO/10    | -           | -                 |
|                                       | AGR/11    | -           | -                 |                                       | CRO/11    | +           | +                 |                                      | FRO/11    | +           | +                 |
|                                       | AGR/12    | -           | -                 |                                       | CRO/12    | +           | +                 |                                      | FRO/12    | -           | -                 |
|                                       | AGR/13    | +           | +                 |                                       | CRO/13    | -           | -                 |                                      | FRO/13    | -           | -                 |
|                                       | AGR/14    | +           | +                 |                                       | CRO/14    | -           | -                 |                                      | FRO/14    | -           | -                 |
|                                       | AGR/15    | -           | -                 |                                       | CRO/15    | -           | -                 |                                      | FRO/15    | -           | -                 |
|                                       | AGR/16    | -           | -                 |                                       | CRO/16    | +           | +                 |                                      | FRO/16    | -           | -                 |
|                                       | AGR/17    | +           | +                 |                                       | CRO/17    | -           | -                 |                                      | FRO/17    | -           | -                 |
|                                       | AGR/18    | -           | -                 |                                       | CRO/18    | -           | +                 |                                      | FRO/18    | +           | +                 |
|                                       | AGR/19    | +           | +                 |                                       | CRO/19    | +           | +                 |                                      | FRO/19    | -           | -                 |
|                                       | AGR/20    | -           | -                 |                                       | CRO/20    | +           | +                 |                                      | FRO/20    | -           | -                 |
| Trapani province<br>(Sicily, Italy)   | TRA/01    | -           | +                 | Taranto province<br>(Apulia, Italy)   | TAR/01    | +           | +                 | Terni province<br>(Umbria, Italy)    | TER/01    | -           | -                 |
|                                       | TRA/02    | -           | -                 |                                       | TAR/02    | -           | +                 |                                      | TER/02    | -           | -                 |
|                                       | TRA/03    | -           | -                 |                                       | TAR/03    | -           | -                 |                                      | TER/03    | -           | -                 |
|                                       | TRA/04    | -           | -                 |                                       | TAR/04    | -           | -                 |                                      | TER/04    | +           | +                 |
|                                       | TRA/05    | +           | +                 |                                       | TAR/05    | +           | +                 |                                      | TER/05    | -           | -                 |
|                                       | TRA/06    | -           | -                 |                                       | TAR/06    | -           | -                 |                                      | TER/06    | -           | -                 |

|                        |        |   |   |  |        |   |   |  |        |   |   |
|------------------------|--------|---|---|--|--------|---|---|--|--------|---|---|
| OLYaV positive control | TRA/07 | - | - |  | TAR/07 | - | + |  | TER/07 | - | - |
|                        | TRA/08 | - | - |  | TAR/08 | + | + |  | TER/08 | - | - |
|                        | TRA/09 | - | - |  | TAR/09 | - | + |  | TER/09 | - | - |
|                        | TRA/10 | - | - |  | TAR/10 | - | - |  | TER/10 | - | - |
|                        | TRA/11 | - | - |  | TAR/11 | - | - |  | TER/11 | - | - |
|                        | TRA/12 | - | - |  | TAR/12 | - | - |  | TER/12 | - | - |
|                        | TRA/13 | + | + |  | TAR/13 | + | + |  | TER/13 | - | - |
|                        | TRA/14 | - | - |  | TAR/14 | - | - |  | TER/14 | - | - |
|                        | TRA/15 | + | + |  | TAR/15 | - | - |  | TER/15 | - | + |
|                        | TRA/16 | + | + |  | TAR/16 | + | + |  | TER/16 | - | - |
|                        | TRA/17 | - | - |  | TAR/17 | - | - |  | TER/17 | + | + |
|                        | TRA/18 | - | - |  | TAR/18 | + | + |  | TER/18 | - | - |
|                        | TRA/19 | - | - |  | TAR/19 | + | + |  | TER/19 | - | - |
|                        | TRA/20 | - | - |  | TAR/20 | + | + |  | TER/20 | - | - |
| OLYaV positive control | PC     | / | + |  |        |   |   |  |        |   |   |
